# Supplementary material for: Baseline Cytokine Profiles of Tuberculin-Specific CD4+ T Cells in Non–Muscle-Invasive Bladder Cancer May Predict Outcomes of BCG Immunotherapy
Source: Oxford University Press journal article supplement (doi:10.1158/2326-6066.cir-18-0046), 2018-08-17
Supplement: 23266066cir180046-sup-196423_2_supp_4930779_pcqpw9.docx [file 23266066cir180046-sup-196423_2_supp_4930779_pcqpw9.docx]

**Supplementary Figure S5: Functional CD4 T-cell subsets producing IFN-, TNF, and IL-2 simultaneously or TNF alone are significantly associated with outcome.** The functional diversity of CD4 T-cells was visualized using SPICE software. Functional subsets by group are represented by scatter plots/bars (above) and as a pie segments (below). The color legend for the pie charts is located below the scatter plots/bars for each subset. Individual data points are shown. Bars/thick horizontal lines show the median, whiskers show IQR.P-values for differences between the groups are indicated for p≤0.05 (after applying Bonferoni multiple endpoint correction the significance threshold would be p=0.00625).

**Supplementary Figure S6: Functional CD4 T-cell subsets producing IFN-, and TNF but not IL-17 are significantly positively associate with recurrence free survival.** The functional diversity of CD4 T-cells was visualized using SPICE software. Functional subsets by group are represented by scatter plots/bars (above) and as a pie segments (below). The color legend for the pie charts is located below the scatter plots/bars for each subset. Individual data points are shown. Bars/thick horizontal lines show the median, whiskers show IQR.P-values for differences between the groups are indicated for p≤0.05 (after applying Bonferoni multiple endpoint correction the significance threshold would be p=0.00625).
