# Supplementary material for: Baseline Cytokine Profiles of Tuberculin-Specific CD4+ T Cells in Non–Muscle-Invasive Bladder Cancer May Predict Outcomes of BCG Immunotherapy
Source: Oxford University Press journal article supplement (doi:10.1158/2326-6066.cir-18-0046), 2018-08-17
Supplement: 23266066cir180046-sup-196423_2_supp_4930782_pcqpw9.docx [file 23266066cir180046-sup-196423_2_supp_4930782_pcqpw9.docx]

**Supplementary Figure S3: Recurrence-free survival is significantly associated with tuberculin-induced IL-2 secretion prior to induction therapy.**  Kaplan-Meyer survival plots show recurrence-free survival. **(A)** Survival of all individuals over the follow-up period. Censored events are shown as filled circles. **(B)** By retrospectively assigning individuals to two groups based on a cut-off of 250pg/ml of tuberculin-induced IL-2, two significantly different survival curves are generated, illustrating the potential of tuberculin-induced IL-2 secretion in predicting BCG immunotherapy outcome. The dotted vertical lines indicate the 6 months time point.
