# Supplementary material for: Baseline Cytokine Profiles of Tuberculin-Specific CD4+ T Cells in Non–Muscle-Invasive Bladder Cancer May Predict Outcomes of BCG Immunotherapy
Source: Oxford University Press journal article supplement (doi:10.1158/2326-6066.cir-18-0046), 2018-08-17
Supplement: 23266066cir180046-sup-196423_2_supp_4930783_pcqpw9.docx [file 23266066cir180046-sup-196423_2_supp_4930783_pcqpw9.docx]

**Supplementary Figure S2: Gating strategy.** Activated T-cells were identified by the expression of one or more activation markers. Lymphocytes were gated in a side-scatter (area) versus forward scatter (area) plot. Single lymphocytes were identified in a forward scatter (area) versus forward scatter (height) plot. Live cells were then gated in a side scatter versus live/dead fluorescence plot. Among single, live lymphocytes, activated CD4 T-cells were identified on a CD3 (fluorescence) versus CD4 (fluorescence) plot allowing for activation-induced CD3 and CD4 down-regulation on activated events. Activation marker positive events were subsequently gated on CD4 (fluorescence) versus activation marker (fluorescence) plots. Positive events identified in unstimulated samples were subtracted by those identified in stimulated samples (gate by gate). For the purpose of subtraction, activated events were expressed as fraction of all CD4 T-cells.
