# Supplementary material for: Baseline Cytokine Profiles of Tuberculin-Specific CD4+ T Cells in Non–Muscle-Invasive Bladder Cancer May Predict Outcomes of BCG Immunotherapy
Source: Oxford University Press journal article supplement (doi:10.1158/2326-6066.cir-18-0046), 2018-08-17
Supplement: 23266066cir180046-sup-196423_2_supp_4930784_pcqpw9.docx [file 23266066cir180046-sup-196423_2_supp_4930784_pcqpw9.docx]

**Supplementary Figure S1**

**Supplementary Figure S1: Study time line.** Patients received one weekly instillation of intravesical BCG (‘BCG’) in weeks 1-6, 15-17, 27-29, and 39-41. Urine (‘Ur’) and Blood (‘Bl’) samples for research were collected immediately before induction therapy. An additional urine sample was collected 4 hours after last BCG induction dose, and additional blood sample immediately before the first BCG maintenance dose. Cystoscopy/biopsies (‘C&B’) were performed every 12 weeks.
