# Supplementary material for: Baseline Cytokine Profiles of Tuberculin-Specific CD4+ T Cells in Non–Muscle-Invasive Bladder Cancer May Predict Outcomes of BCG Immunotherapy
Source: Oxford University Press journal article supplement (doi:10.1158/2326-6066.cir-18-0046), 2018-08-17
Supplement: 23266066cir180046-sup-196423_2_supp_4930785_pcqpw9.docx [file 23266066cir180046-sup-196423_2_supp_4930785_pcqpw9.docx]

**Supplementary Table S1:** Urine cytokines before and after induction therapya

| **Cytokine** | **Time point (TP)/change** | **Urine level**  Median (Range) | | **P for group differenceb** |
| --- | --- | --- | --- | --- |
|  |  | **No recurrence (n=28)** | **Recurrence (n=14)** |  |
| **IFN-** | TP 1 | 0 (0 – 50) | 0 (0-1) | n.s. |
|  | TP 2 | 134.5 (1 – 39310) | 34 (0 – 7782) | n.s. |
|  | TP2 – TP1 (change) | 134.5 (1 – 39310) | 34 (-1 – 7782) | n.s. |
| **IL-2** | TP 1 | 0 (0 – 1) | 0 (0 – 1) | n.s. |
|  | TP 2 | 151 (4 – 1905) | 62 (1 – 1111) | n.s. |
|  | TP2 – TP1 (change) | 151 (4 – 1905) | 62 (0 – 1111) | n.s. |
| **TNF** | TP 1 | 0 (0 – 3) | 0 (0 – 1) | n.s. |
|  | TP 2 | 47 (0 – 654) | 13.5 (1 – 256) | 0.043 |
|  | TP2 – TP1 (change) | 47 (0 – 654) | 13.5 (1 – 255) | 0.046 |
| **IL-4** | TP 1 | 0 (0 – 1) | 0 (0 - 0) | n.s. |
|  | TP 2 | 2.5 (0 – 64) | 1 (0 – 5) | n.s. |
|  | TP2 – TP1 (change) | 2.5 (0 – 64) | 1 (0 – 5) | n.s. |
| **IL-10** | TP 1 | 0 (0 – 1) | 0 (0 -0) | n.s. |
|  | TP 2 | 6 (0 – 251) | 4.5 (0 – 79) | n.s. |
|  | TP2 – TP1 (change) | 6 (0 – 251) | 4.5 (0 – 79) | n.s. |
| **IL-13** | TP 1 | 0 (0 – 30) | 0 (0 – 13) | n.s. |
|  | TP 2 | 40.5 (5 – 155) | 36.5 (6 – 78) | n.s. |
|  | TP2 – TP1 (change) | 31 (-10 – 155) | 36.5 (4 – 65) | n.s. |
| **IL-1b** | TP 1 | 1 (0 – 45) | 2 (0 – 21) | n.s. |
|  | TP 2 | 813.5 (14 – 17267) | 856.5 (4 – 3021) | n.s. |
|  | TP2 – TP1 (change) | 798.5 (13 – 17251) | 855 (0 – 3015) | n.s. |
| **IL-6** | TP 1 | 5 (0 – 116) | 3.5 (0 – 23) | n.s. |
|  | TP 2 | 226 (2 – 1978) | 122 (3 – 903) | n.s. |
|  | TP2 – TP1 (change) | 222 (-10-1976) | 115 (-13 – 889) | n.s. |
| **IL-8** | TP 1 | 165.5 (6 – 2763) | 97.5 (2 – 11688) | n.s. |
|  | TP 2 | 6707 (378 – 72713) | 3889.5 (530 – 19254) | n.s. |
|  | TP2 – TP1 (change) | 6528.5 (-1145 – 72252) | 3844 (333 – 13866) | n.s. |
| **IL12p70** | TP 1 | 0 (0 – 1) | 0 (0 - 0) | n.s. |
|  | TP 2 | 4.5 (0 – 29) | 3 (0 – 8) | n.s. |
|  | TP2 – TP1 (change) | 4.5 (0 – 29) | 3 (0 – 8) | n.s. |

a Urine samples were collected immediately prior to induction therapy (time point 1) and 4 hours after the 6th instillation (time point 2).

b p-values ≤ 0.05 are indicated, however, following multiple end-point correction, the significance level is 0.005.
